# Supplementary material for: Tribological properties of novel palygorskite nanoplatelets used as oil-based lubricant additives
Source: Springer Nature journal article supplement (doi:10.1007/s40544-019-0347-6), 2020-05-12
Supplement: 40544_2019_347_MOESM1_ESM.pdf [file 40544_2019_347_MOESM1_ESM.pdf]

## Electronic Supplementary Material

# Tribological properties of novel palygorskite nanoplatelets used as oil-based lubricant additives

Kunpeng WANG<sup>1,2</sup>, Huaichao WU<sup>1,\*</sup>, Hongdong WANG<sup>2</sup>, Yuhong LIU<sup>2,\*</sup>, Lv YANG<sup>1</sup>, Limei ZHAO<sup>1</sup>

<sup>1</sup> School of Mechanical Engineering, Guizhou University, Guiyang 550025, China

<sup>2</sup> State Key Laboratory of Tribology, Tsinghua University, Beijing 100084, China

Supporting information to <https://doi.org/10.1007/s40544-019-0347-6>

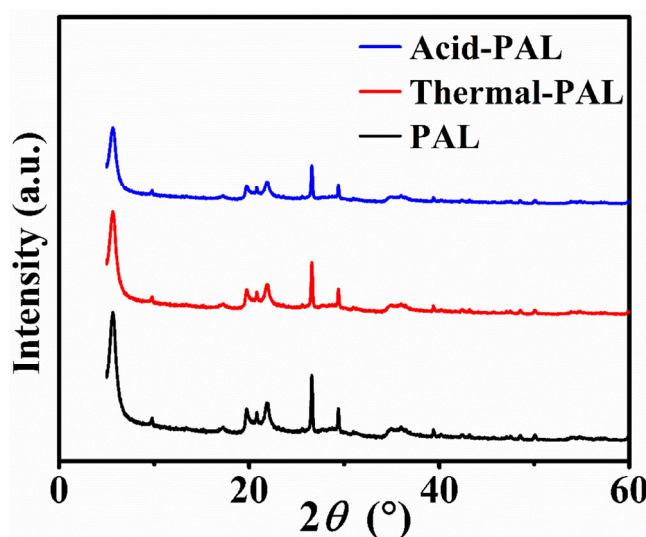

**Fig. S1** XRD patterns of AMO-PMo prepared with the novel method and obtained for thin layers of materials coated on glass plates (Cu radiation; scanning rate: 2 (°)/min).

\* Corresponding author: Huaichao WU, E-mail: [hcwu@gzu.edu.cn](mailto:hcwu@gzu.edu.cn); Yuhong LIU, E-mail: [liuyuhong@tsinghua.edu.cn](mailto:liuyuhong@tsinghua.edu.cn)

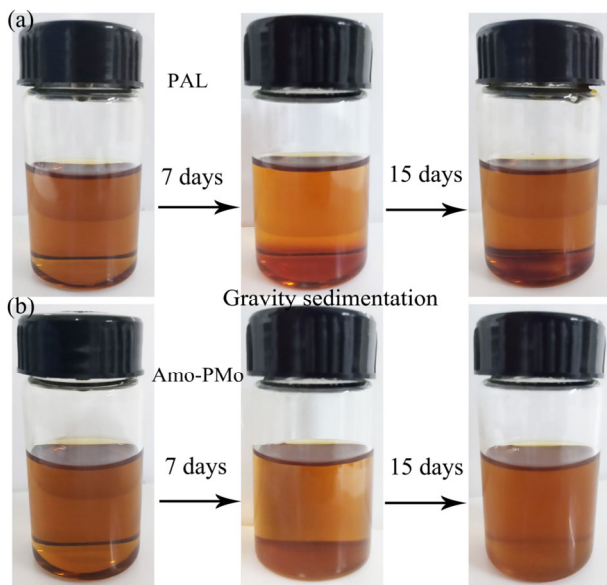

**Fig. S2** Gravity sedimentation experiment: (a) unmodified PAL and (b) Amo-Pmo.

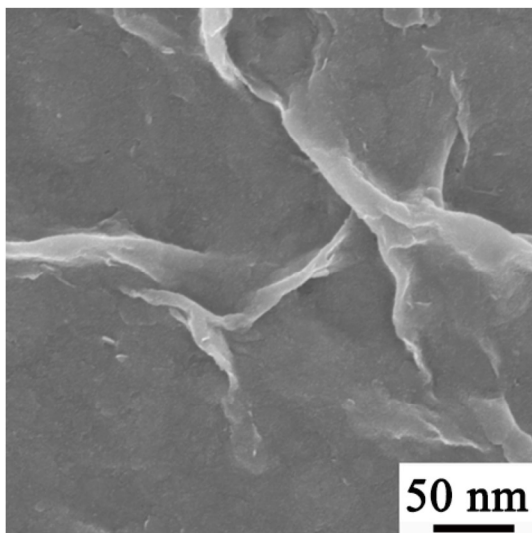

**Fig. S3** SEM image of the synthesized Amo-PMo edge topography.

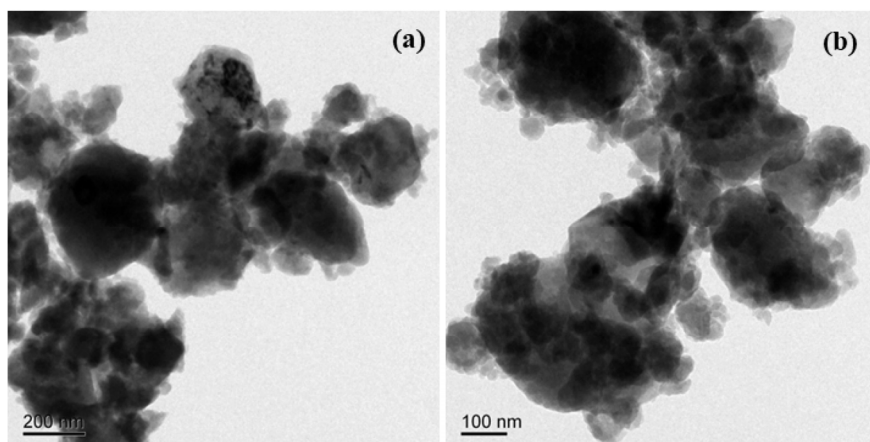

**Fig. S4** TEM images of the PAL prepared without APTES modification: (a) low magnification and (b) high magnification.

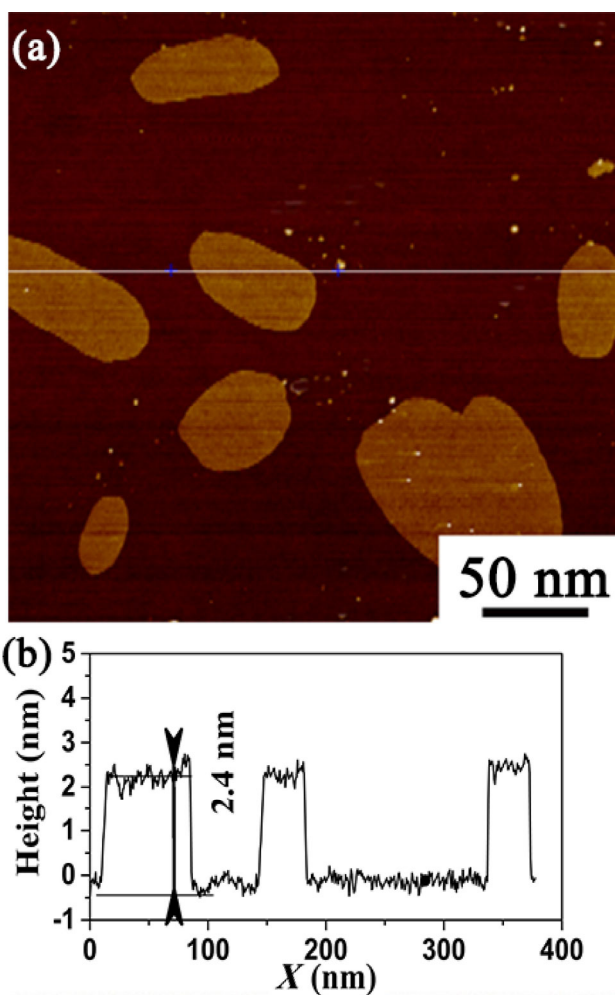

**Fig. S5** (a) AFM image (obtained using tapping mode) of Amo-PMo in cyclohexane (0.1 g/L) deposited on a mica substrate. (b) The height profile was measured along the marked white line in the AFM image, showing single and double layers of Amo-PMo.

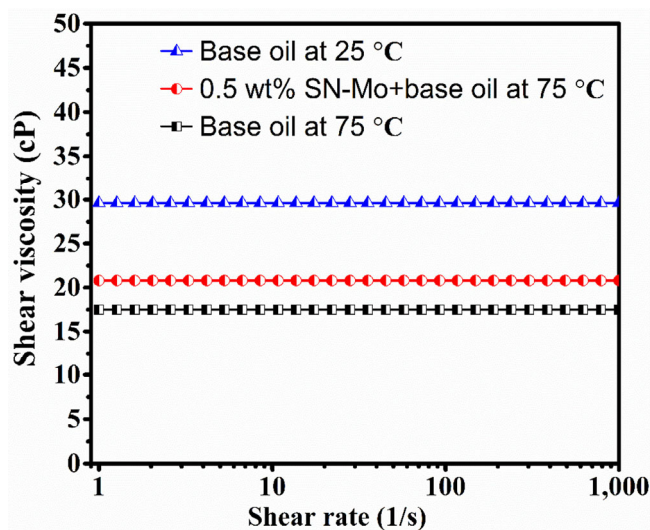

**Fig. S6** Viscosity of the lubricating fluid and the base oil at shear rates from 10 to 1,000  $\text{s}^{-1}$ .

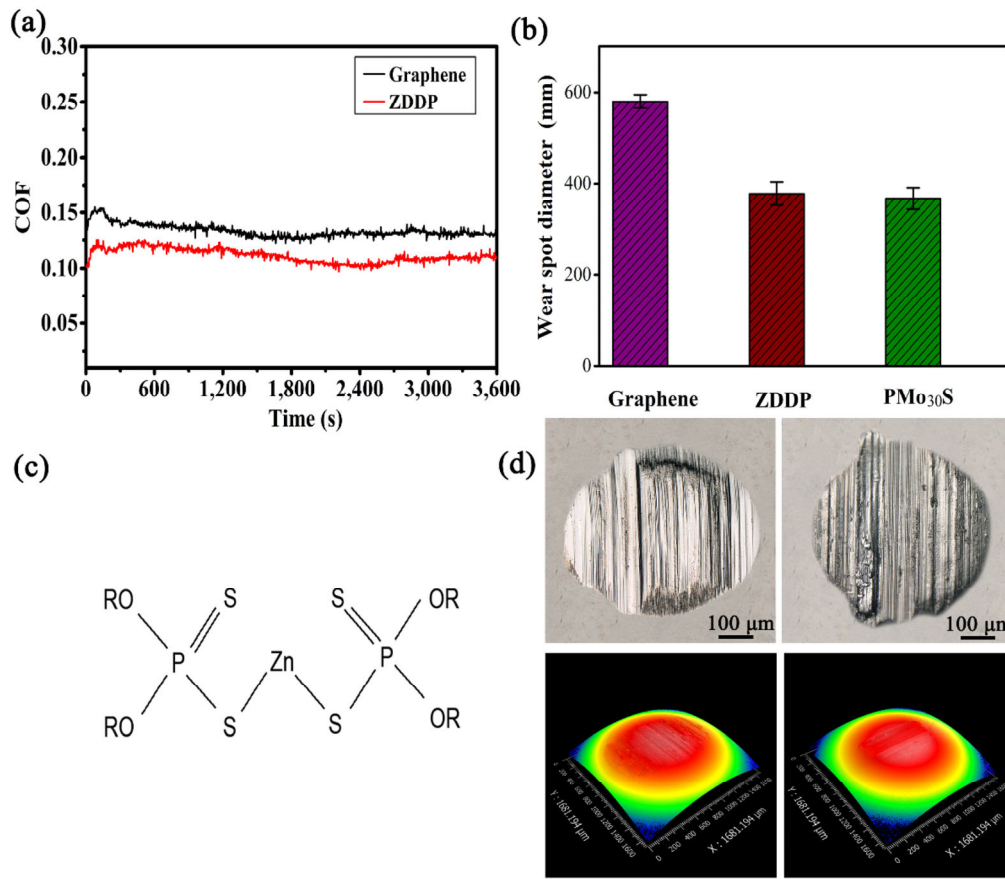

**Fig. S7** (a) COF as a function of time, obtained by testing the lubricants containing 0.5 wt% graphene and ZDDP. (b) Histogram of the wear spot diameter for the lubricants with different graphene, ZDDP, and PMo<sub>30</sub>S contents. (c) Molecular formulas of ZDDP. (d) Optical images of the wear scars tested for graphene and ZDDP.

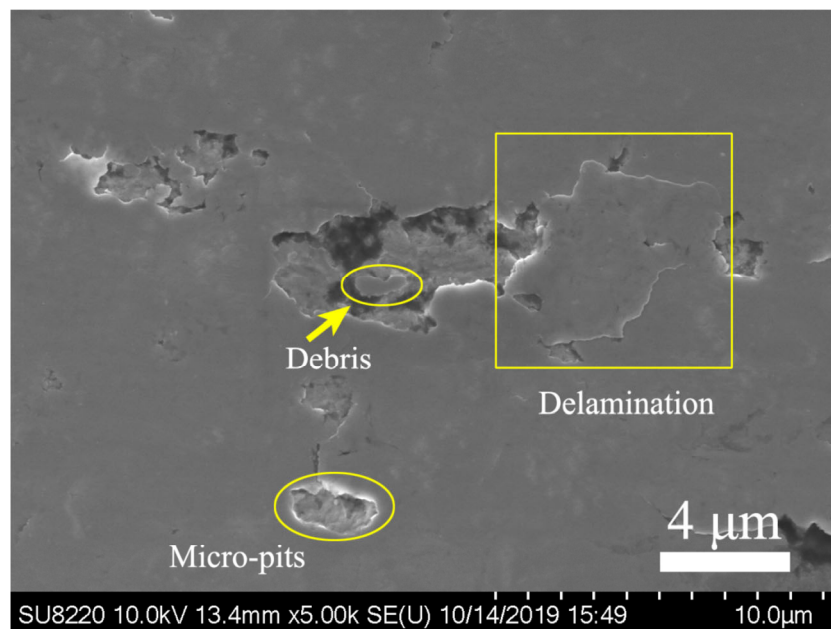

**Fig. S8** SEM images of the surfaces tested with the base oil after running for 1 h.

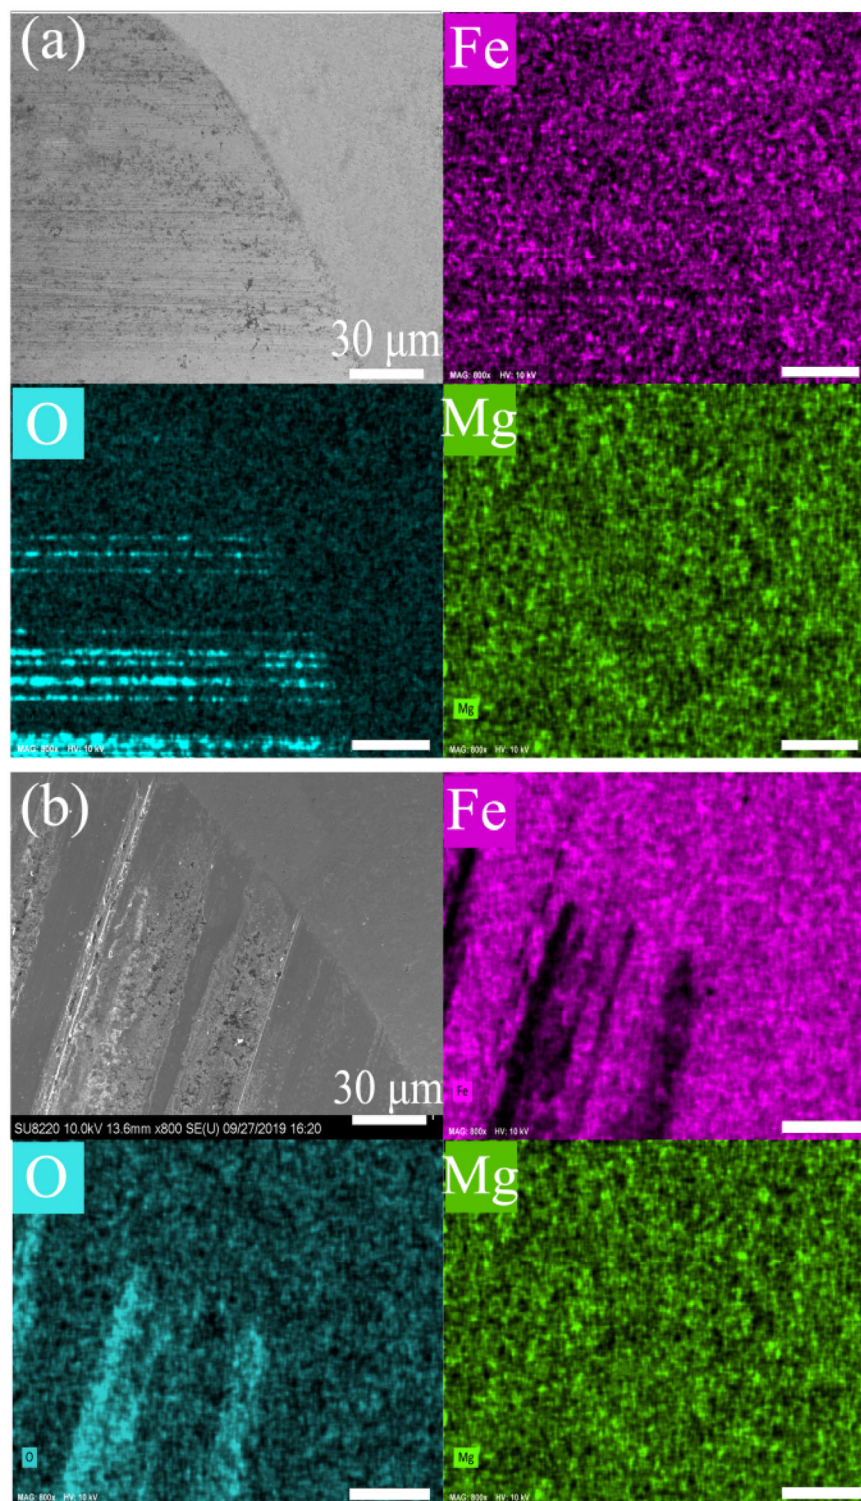

**Fig. S9** EDS mapping analysis for the wear surface lubricated by (a) the base oil and (b) 0.5 wt% PAL.

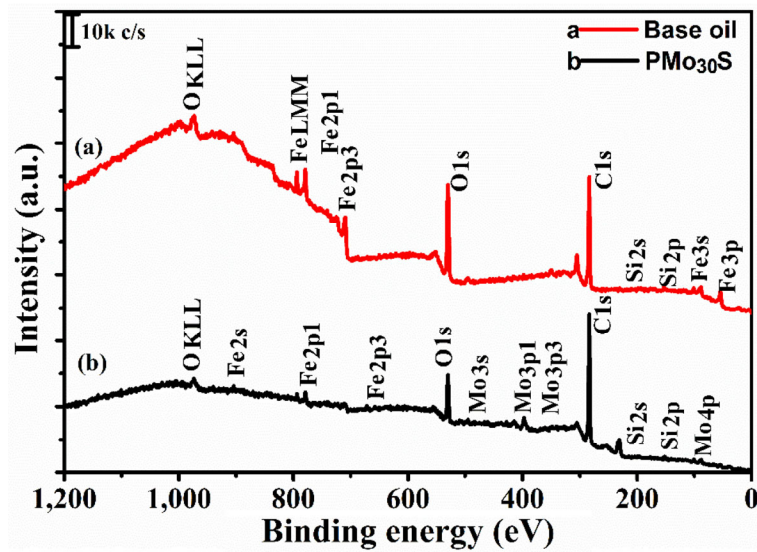

Fig. S10 XPS surface analysis of the samples: (a) the base oil and (b)  $\text{PMo}_{30}\text{S}$ .

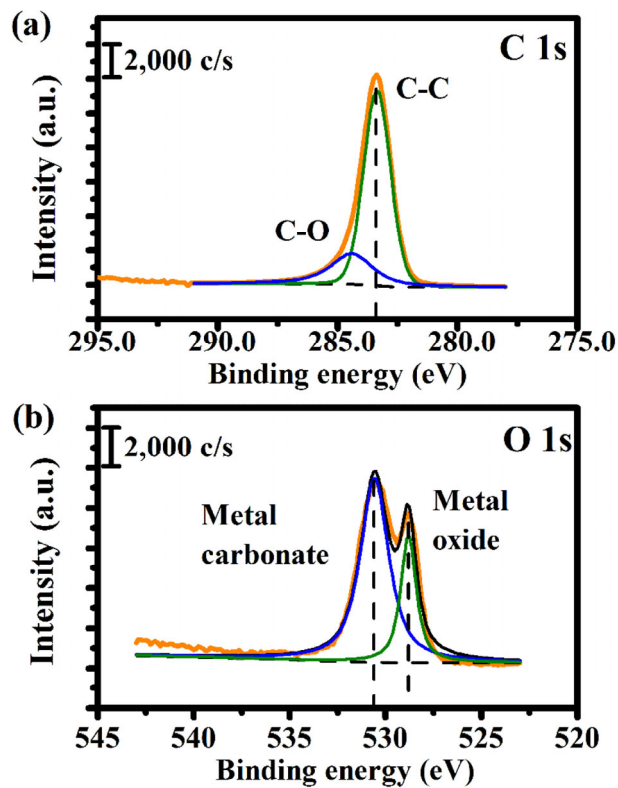

Fig. S11 XPS spectra of the elements on the surface of the  $\text{PMo}_{30}\text{S}$  sample: (a) C XPS spectrum and (b) O XPS spectrum.
